# Supplementary material
Source: publisher figshare collection journal article supplement (https://acs.figshare.com/ndownloader/files/12839699)
Supplement: Supplementary file 1 [file 12839699]

## Sheet: 4
Identification result of 16 quaternary mixtures with equal bacterial amount (1E5 cell copies each).
sample1	sample2	sample3	sample4	reference1	reference2	reference3	confidence1	confidence2	confidence3
Escherichia coli ATCC 25922	Klebsiella pneumoniae ATCC 700603	Pseudomonas aeruginosa ATCC 27853	Staphylococcus aureus ATCC 25923	Escherichia coli	Staphylococcus aureus	Pseudomonas aeruginosa	1	0.85	0.41
Enterobacter cloacae ATCC 23373	Escherichia coli ATCC 25922	Klebsiella pneumoniae ATCC 700603	Pseudomonas aeruginosa ATCC 27853	Escherichia coli	Enterobacter cloacae	Klebsiella pneumoniae	1	0.95	0.72
Enterobacter cloacae ATCC 23373	Escherichia coli ATCC 25922	Klebsiella pneumoniae ATCC 700603	Staphylococcus aureus ATCC 25923	Escherichia coli	Enterobacter cloacae	Staphylococcus aureus	0.9	0.82	0.8
Enterobacter cloacae ATCC 23373	Escherichia coli ATCC 25922	Pseudomonas aeruginosa ATCC 27853	Staphylococcus aureus ATCC 25923	Escherichia coli	Enterobacter cloacae	Staphylococcus aureus	0.99	0.96	0.63
Enterobacter cloacae ATCC 23373	Klebsiella pneumoniae ATCC 700603	Pseudomonas aeruginosa ATCC 27853	Staphylococcus aureus ATCC 25923	Enterobacter cloacae	Staphylococcus aureus	Pseudomonas aeruginosa	1	0.98	0.6
Klebsiella oxytoca ATCC 13182	Escherichia coli ATCC 25922	Klebsiella pneumoniae ATCC 700603	Pseudomonas aeruginosa ATCC 27853	Klebsiella oxytoca	Escherichia coli	Enterobacter cloacae	0.99	0.98	0.36
Klebsiella oxytoca ATCC 13182	Escherichia coli ATCC 25922	Klebsiella pneumoniae ATCC 700603	Staphylococcus aureus ATCC 25923	Escherichia coli	Klebsiella oxytoca	Staphylococcus aureus	0.9	0.78	0.71
Klebsiella oxytoca ATCC 13182	Escherichia coli ATCC 25922	Pseudomonas aeruginosa ATCC 27853	Staphylococcus aureus ATCC 25923	Escherichia coli	Klebsiella oxytoca	Enterobacter cloacae	0.99	0.94	0.46
Klebsiella oxytoca ATCC 13182	Enterobacter cloacae ATCC 23373	Escherichia coli ATCC 25922	Klebsiella pneumoniae ATCC 700603	Escherichia coli	Klebsiella oxytoca	Enterobacter cloacae	0.91	0.88	0.76
Klebsiella oxytoca ATCC 13182	Enterobacter cloacae ATCC 23373	Escherichia coli ATCC 25922	Pseudomonas aeruginosa ATCC 27853	Klebsiella oxytoca	Escherichia coli	Enterobacter cloacae	0.98	0.94	0.9
Klebsiella oxytoca ATCC 13182	Enterobacter cloacae ATCC 23373	Escherichia coli ATCC 25922	Staphylococcus aureus ATCC 25923	Escherichia coli	Klebsiella oxytoca	Staphylococcus aureus	0.86	0.86	0.75
Klebsiella oxytoca ATCC 13182	Enterobacter cloacae ATCC 23373	Klebsiella pneumoniae ATCC 700603	Pseudomonas aeruginosa ATCC 27853	Klebsiella oxytoca	Enterobacter cloacae	Vibrio mimicus	1	0.93	0.22
Klebsiella oxytoca ATCC 13182	Enterobacter cloacae ATCC 23373	Klebsiella pneumoniae ATCC 700603	Staphylococcus aureus ATCC 25923	Klebsiella oxytoca	Staphylococcus aureus	Klebsiella pneumoniae	0.98	0.92	0.63
Klebsiella oxytoca ATCC 13182	Enterobacter cloacae ATCC 23373	Pseudomonas aeruginosa ATCC 27853	Staphylococcus aureus ATCC 25923	Klebsiella oxytoca	Staphylococcus aureus	Enterobacter cloacae	0.95	0.93	0.88
Klebsiella oxytoca ATCC 13182	Klebsiella pneumoniae ATCC 700603	Pseudomonas aeruginosa ATCC 27853	Staphylococcus aureus ATCC 25923	Klebsiella oxytoca	Enterobacter cloacae	Vibrio fluvialis	0.99	0.6	0.36
Vibrio parahaemolyticus ATCC 17802	Vibrio alginolyticus ATCC 17749	Vibrio mimicus ATCC 33653	Vibrio fluvialis ATCC 33809	Vibrio alginolyticus	Vibrio mimicus	Vibrio fluvialis	0.89	0.89	0.8
gray color indiciates the results excluded by the conf score threshold 0.88
yellow color indiciates that the component in the sample was not identified

## Sheet: 5
Identification result of 6 pentabasic mixtures with equal bacterial amount (1E5 cell copies each).
sample1	sample2	sample3	sample4	sample5	reference1	reference2	reference3	confidence1	confidence2	confidence3
Enterobacter cloacae ATCC 23373	Escherichia coli ATCC 25922	Klebsiella pneumoniae ATCC 700603	Pseudomonas aeruginosa ATCC 27853	Staphylococcus aureus ATCC 25923	Escherichia coli	Enterobacter cloacae	Staphylococcus aureus	0.9	0.81	0.72
Klebsiella oxytoca ATCC 13182	Escherichia coli ATCC 25922	Klebsiella pneumoniae ATCC 700603	Pseudomonas aeruginosa ATCC 27853	Staphylococcus aureus ATCC 25923	Klebsiella oxytoca	Escherichia coli	Staphylococcus aureus	0.93	0.81	0.71
Klebsiella oxytoca ATCC 13182	Enterobacter cloacae ATCC 23373	Escherichia coli ATCC 25922	Klebsiella pneumoniae ATCC 700603	Pseudomonas aeruginosa ATCC 27853	Pseudomonas aeruginosa	Enterobacter cloacae	Klebsiella oxytoca	0.9	0.79	0.76
Klebsiella oxytoca ATCC 13182	Enterobacter cloacae ATCC 23373	Escherichia coli ATCC 25922	Klebsiella pneumoniae ATCC 700603	Staphylococcus aureus ATCC 25923	Klebsiella oxytoca	Escherichia coli	Enterobacter cloacae	0.92	0.9	0.59
Klebsiella oxytoca ATCC 13182	Enterobacter cloacae ATCC 23373	Escherichia coli ATCC 25922	Pseudomonas aeruginosa ATCC 27853	Staphylococcus aureus ATCC 25923	Staphylococcus aureus	Escherichia coli	Klebsiella oxytoca	0.83	0.74	0.7
Klebsiella oxytoca ATCC 13182	Enterobacter cloacae ATCC 23373	Klebsiella pneumoniae ATCC 700603	Pseudomonas aeruginosa ATCC 27853	Staphylococcus aureus ATCC 25923	Klebsiella oxytoca	Enterobacter cloacae	Escherichia coli	0.96	0.81	0.29
